# Supplementary material for: The effect of different Climate and Air Quality policies in China on in situ Ozone production in Beijing
Source: Copernicus journal article supplement (doi:10.5194/egusphere-2023-2910), 2024-01-29
Supplement: Supplementary file 1 [file egusphere-2023-2910-supplement.pdf]

# Supplement: The effect of different Climate and Air Quality policies in China on in situ Ozone production in Beijing

Beth S. Nelson<sup>1</sup>, Zhenze Liu<sup>2a</sup>, Freya A. Squires<sup>1b</sup>, Marvin Shaw<sup>1,3</sup>, James R. Hopkins<sup>1,3</sup>, Jacqueline F. Hamilton<sup>1,3</sup>, Andrew R. Rickard<sup>1,3</sup>, Alastair C. Lewis<sup>1,3</sup>, Zongbo Shi<sup>4</sup>, James D. Lee<sup>1,3</sup>

5 <sup>1</sup>Wolfson Atmospheric Chemistry Laboratories, Department of Chemistry, University of York, Heslington, York, YO10 5DD, UK.

<sup>2</sup>School of Geosciences, The University of Edinburgh, Edinburgh, UK.

<sup>3</sup>National Centre for Atmospheric Science, University of York, Heslington, York, YO10 5DD, UK.

<sup>4</sup>School of Geography, Earth and Environmental Sciences, University of Birmingham, Birmingham, B152TT, UK.

10

<sup>a</sup>now at: School of Environmental Science and Engineering, Nanjing University of Information Science and Technology, Nanjing, China

<sup>b</sup>now at: British Antarctic Survey, Natural Environment Research Council, Cambridge, CB3 0ET, UK

Correspondence to: Beth S. Nelson (beth.nelson@york.ac.uk)

15

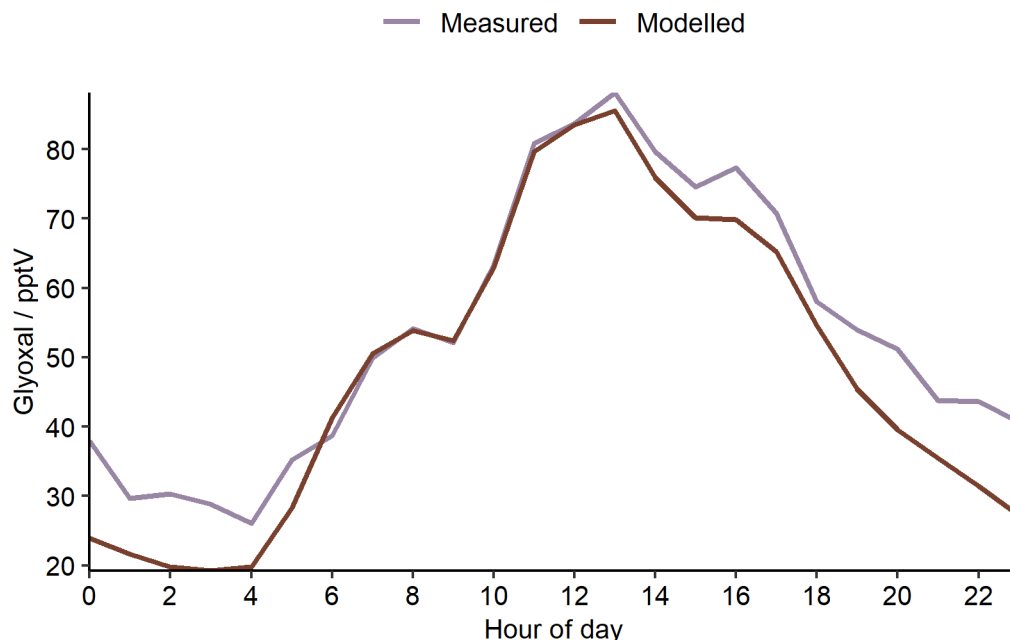

**Figure S1:** Diel mean campaign mixing ratios of glyoxal (purple) and modelled mixing ratios of glyoxal (brown).
