# Supplementary material for: The effect of different Climate and Air Quality policies in China on in situ Ozone production in Beijing
Source: Copernicus journal article supplement (doi:10.5194/egusphere-2023-2910), 2024-01-29
Supplement: Supplementary file [file egusphere-2023-2910-AC1-supplement.pdf]

RC1: ['Comment on egusphere-2023-2910'](#), Anonymous Referee #2, 14 Mar 2024

This article describes a detailed chemical box model incorporating the Master Chemical Mechanism to investigate the impact of combined air quality and carbon neutrality policies on O<sub>3</sub> formation in Beijing. The results showed that O<sub>3</sub> production was most sensitive to changes in the OLE2 group of VOCs, while reducing less reactive but higher concentration species led to larger reductions in O<sub>3</sub> production under all scenarios. In general, the idea of the article is clear and the text is smooth. Some details need to be strengthened to meet the publication requirements. Specific comments are as follows.

We thank the reviewer for reading our manuscript carefully and for their useful comments and suggestions. Point by point responses are given below:

Line 38-46: The introduction of O<sub>3</sub> are lengthy and need to be reduced to core point.

The detailed description of the human and crop health implications of ozone pollution has been reduced in the manuscript.

When the sentence is connected to the reference, multiple sentence positions are misplaced, such as 'and lead to malnourished populations. (Ainsworth, 2017; IPCC, 2015; Mills et al., 2018)' should be corrected to 'and lead to malnourished populations (Ainsworth, 2017; IPCC, 2015; Mills et al., 2018)'. Please revise throughout the manuscript.

This has been corrected throughout the manuscript.

Line 64-65: 'be' on ' to be account for ' should be removed.

"be" has been removed.

Line 87-94: The box model proposed to evaluate the effect of different Climate on O<sub>3</sub> production is suggested to compare with other models.

I have added a reference to this statement. Although chemical box models have been used extensively to explore photochemistry using field data, it is not common to use them to vary model inputs by future Climate projections.

Line 86: "Where comprehensive VOC datasets are available, observationally constrained models incorporating detailed chemical mechanisms, such as the Master Chemical Mechanism (MCM, [mcm.york.ac.uk](http://mcm.york.ac.uk), Jenkin et al., 2015) can be used to

investigate how changes in VOCs, NO<sub>x</sub> and aerosol surface area (ASA) may impact in situ O<sub>3</sub> formation (Nelson et al., 2021).”

Line 149-150: There is a lack of complete bracket.

Close bracket has been added.

Line 204-220: How to deal with meteorological parameters when adjusting the observational dataset of pollutants in the model.

Unfortunately, there is insufficient inventory data and large uncertainties associated with how the meteorology might change in the future scenarios. As a result, these are kept at observational levels for all scenarios, and we only focus on how changes in the pollutant concentrations may impact future chemistry leading to ozone formation. I have added some text to make this clear to the reader:

Line 204: “This study focuses on the impacts of emission changes on chemical processing, and it is likely that meteorology will also evolve due to a changing climate. However, here we assume that meteorological parameters remain at observed (APHH 2017) levels in all scenarios.”

Line 379-382: The points in 'Methanol emissions are projected to increase compared to 2017 levels under the Ambitious Pollution 1.5D goals until 2040' and 'the observed increase in methanol of ca. 25% up to 2040 could have a more pronounced impact on increasing O<sub>3</sub> production than smaller incremental changes in more reactive species such as OLE<sub>2</sub>' is inconsistent with the varies of MEOH group from Figure 3.

The authors would like to thank the reviewer for spotting this error. It is ethane, not methanol, emissions that are projected to increased compared to 2017 under the Ambitious Pollution 1.5D goals until 2040. This has been corrected in the text.

Lines 376 – 389:

The sensitivities of modelled O<sub>3</sub> production to these VOCs can be combined with the trends in projected concentrations presented in Figure 4 to explain why O<sub>3</sub> production is not reduced the most under the *Ambitious Pollution 1.5D goals* between 2030 - 2045. Ethane (ALK1) emissions are projected to increase compared to 2017 levels under the *Ambitious Pollution 1.5D goals* until 2040 and are a large proportion of AVOCs by mixing ratio (Figure 3). Although increasing ethane mixing ratios by 5% only leads to an increase in O<sub>3</sub> production of 0.02%, the observed increase in ethane of ca. 25% up to 2040 could have a more pronounced impact on increasing O<sub>3</sub> production than smaller incremental changes in more reactive species such as OLE<sub>2</sub>, that are present in much smaller concentrations by 2025 (< 0.1 ppbV compared to ca. 4 ppbV

of ethane). Similarly, although this study shows that modelled O<sub>3</sub> production rate is not very sensitive to changes in the ALK2 group, substantial concentrations of this VOC group are observed. As a result, the overall trend in AVOCs (Table 2, excluding isoprene, α-pinene, and limonene) shows a weaker decline for the *Ambitious Pollution 1.5D* scenario which is reflected in the modelled O<sub>3</sub> production trend (Figure 4).

Figure S1 and Figure 5 can not be found from this manuscript.

Figure S1 is located in the supporting information document. This is also stated in the text on line 161. Thank you for highlighting an inconsistency in our figure numbering. Line 389 has been changed from “figure 5” to “figure 4”, and then subsequently, figure 6 is now called figure 5, figure 7 is figure 6 etc. throughout the manuscript.

The point that aerosols have a minimal effect on O<sub>3</sub> production was mentioned in previous studies, such as Tan et al. (2020, 2022). The conclusions here should be compared with other studies.

Comparisons to these additional studies have also been included in the text and referenced as appropriate.

Line 418: This is also consistent with previous studies, which suggest there is no evidence that aerosol chemistry has significant impact on ozone production in the North China Plain, and that aerosol light extinction may cancel out the impacts of aerosols on ozone production in South China (Tan et al., 2020, Tan et al., 2022).

Line 437: O<sub>3</sub> subscript writing is wrong.

Subscripting changed.

Line 466-469: The conclusion of 'Between 2030–2045, the most ambitious scenario, Ambitious Pollution 1.5D goals, did not lead to the largest reductions in O<sub>3</sub> production rate. This can be attributed reductions in less reactive species that are present in large amounts in Beijing, such as methanol and the smaller chain alkanes (ALK1 and ALK2)' is right? Please check the conclusion with Line 383-387.

This has also been changed, in line with the changes made in Lines 376 – 389. This now reads as follows:

“This can be attributed reductions in less reactive species that are present in large amounts in Beijing, such as the smaller chain alkanes (ALK1 and ALK2)”
